# Supplementary material
Source: PubMed Central journal article supplement (PMC7145347)
Supplement: ja9b10476_si_001.pdf [file ja9b10476_si_001.pdf]

Supporting information for:

## Insight on shallow trap states introduced photocathodic performance in n-type polymer photocatalysts

Qiushi Ruan,<sup>a,1</sup> Tina Miao,<sup>a,b,1</sup> Hui Wang,<sup>a</sup> Junwang Tang<sup>\*a</sup>

<sup>1</sup> Both authors contributed equally

<sup>a</sup> Department of Chemical Engineering, University College London (UCL), WC1E 7JE, London, United Kingdom

<sup>b</sup> Department of Chemistry, University College London (UCL), WC1H 0AJ, London, United Kingdom

XRD patterns were collected by a D8 Bruker Diffractometer. The UV-Vis absorption spectra were collected using a Shimadzu UV-Vis 2550 spectrophotometer fitted with an integrating sphere using BaSO<sub>4</sub> as the reference material. XPS measurements were done on a ThermoScientific XPS K-alpha surface analysis machine using an Al source. Analysis was performed on the Casa XPS software. SEM images were taken by a JEOL JSM-7401F Scanning Electron Microscope. BET measurements were performed by a Tri Star II. NMR spectra were performed with a solid state NMR spectrometer, Ascend™, 300WB, Bruker. PL spectra were collected by a Renishaw InVia Raman Microscope (325nm).

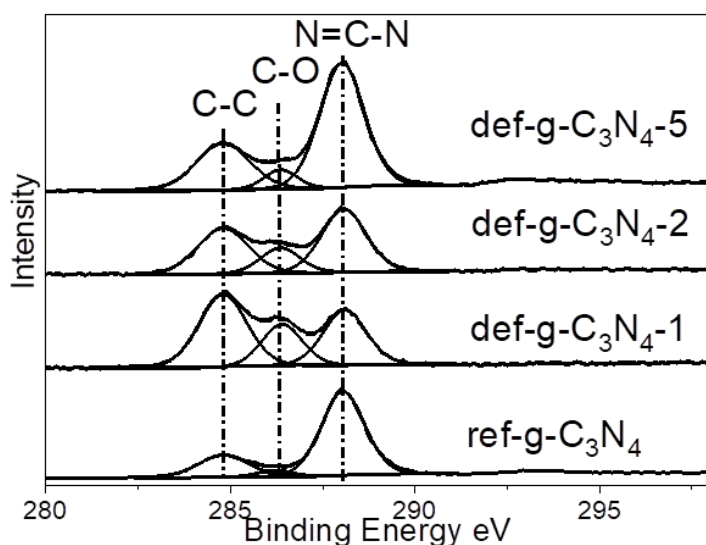

Figure S1. XPS C1s spectra of all samples

Table S1. The ratio of C-O bond to N=C-N bond and C to N ratio in all samples

| Sample                                 | Ratio of C-O/N=C-N | C <sub>x</sub> N <sub>y</sub>         |
|----------------------------------------|--------------------|---------------------------------------|
| ref-g-C <sub>3</sub> N <sub>4</sub>    | 0.047±0.007        | C <sub>3</sub> N <sub>4.10±0.03</sub> |
| def-g-C <sub>3</sub> N <sub>4</sub> -1 | 0.58±0.16          | C <sub>3</sub> N <sub>3.18±0.12</sub> |
| def-g-C <sub>3</sub> N <sub>4</sub> -2 | 0.33±0.07          | C <sub>3</sub> N <sub>3.65±0.04</sub> |
| def-g-C <sub>3</sub> N <sub>4</sub> -5 | 0.13±0.01          | C <sub>3</sub> N <sub>3.61±0.01</sub> |

Table S2 Surface area of def-g-C<sub>3</sub>N<sub>4</sub>-1, def-g-C<sub>3</sub>N<sub>4</sub>-2 and def-g-C<sub>3</sub>N<sub>4</sub>-5 samples determined by BET measurements.

|                                        | Surface area (m <sup>2</sup> /g) |
|----------------------------------------|----------------------------------|
| g-C <sub>3</sub> N <sub>4</sub>        | 10.9                             |
| def-g-C <sub>3</sub> N <sub>4</sub> -1 | 12.9                             |
| def-g-C <sub>3</sub> N <sub>4</sub> -2 | 13.4                             |
| def-g-C <sub>3</sub> N <sub>4</sub> -5 | 18.5                             |

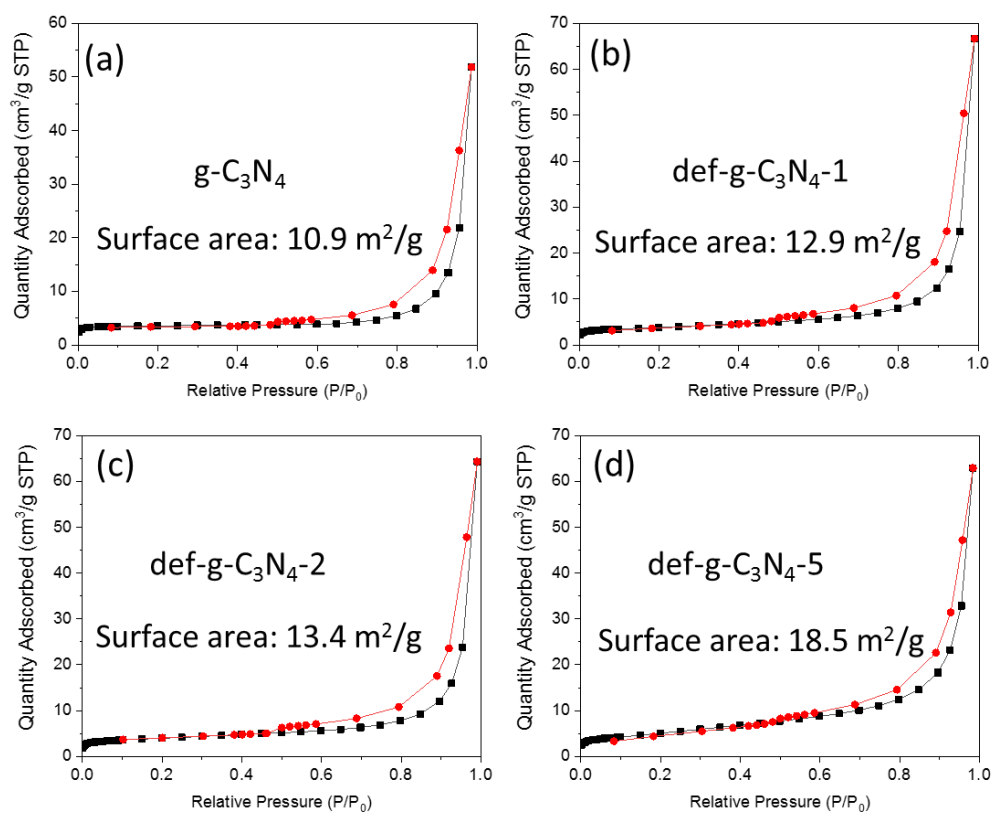

Figure S2 BET measurement of g-C<sub>3</sub>N<sub>4</sub>, def-g-C<sub>3</sub>N<sub>4</sub>-1, def-g-C<sub>3</sub>N<sub>4</sub>-2 and def-g-C<sub>3</sub>N<sub>4</sub>-5 samples

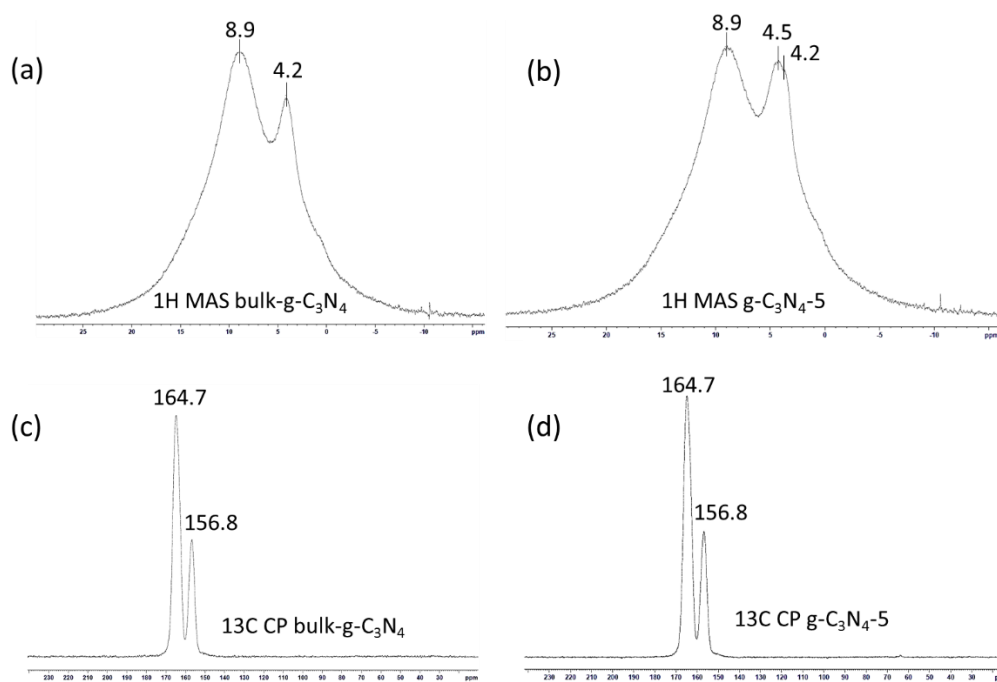

Figure S3.  $^1\text{H}$  MAS solid state NMR spectra of (a) reference bulk- $\text{g-C}_3\text{N}_4$  and (b) def- $\text{g-C}_3\text{N}_4$ -5, as well as  $^{13}\text{C}$  CP MAS solid state NMR spectra of (c) reference bulk- $\text{g-C}_3\text{N}_4$  and (d) def- $\text{g-C}_3\text{N}_4$ -5.

$^1\text{H}$  Solid state NMR spectrum of ref- $\text{g-C}_3\text{N}_4$  contains two main peaks at 8.9 ppm and 4.2 ppm, which can be attributed to the chemical shifts of  $-\text{NH}_x$  ending group and residual water, respectively.<sup>1</sup> An additional clear peak locating at 4.5 ppm is present in def- $\text{g-C}_3\text{N}_4$ -5 sample and can be ascribed to the formation C-OH bonds.<sup>1</sup>  $^{13}\text{C}$  solid state NMR spectra of these two samples show two similar peaks at 156.8 ppm and 164.7 ppm, which has been assigned to C-[N]<sub>3</sub> and CN<sub>2</sub>(NH<sub>2</sub>) groups, respectively<sup>2</sup>

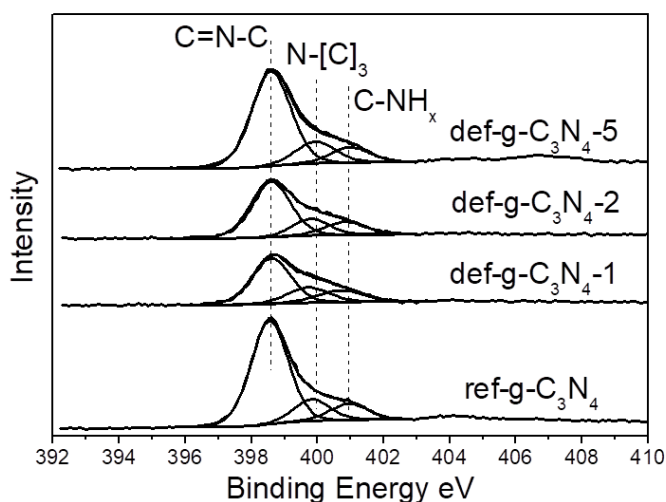

Figure S4 XPS N1s spectra of all  $\text{g-C}_3\text{N}_4$  samples

Table S3 Percentage breakdown of different bonds and ratios of bonds within the N1s spectra

|                                        | C=N-C (sp <sup>2</sup> ) | N-[C] <sub>3</sub> (sp <sup>3</sup> ) | C-NH <sub>x</sub> | sp <sup>2</sup> to sum of sp <sup>3</sup> and C-NH <sub>x</sub> |
|----------------------------------------|--------------------------|---------------------------------------|-------------------|-----------------------------------------------------------------|
| Binding Energy (eV)                    | 398.7                    | 399.9                                 | 401.0             |                                                                 |
| ref-g-C <sub>3</sub> N <sub>4</sub>    | 74.2%                    | 15.7%                                 | 10.2%             | 2.9                                                             |
| def-g-C <sub>3</sub> N <sub>4</sub> -1 | 63.8%                    | 20.9%                                 | 15.3%             | 1.8                                                             |
| def-g-C <sub>3</sub> N <sub>4</sub> -2 | 66.3%                    | 18.2%                                 | 15.5%             | 2.0                                                             |
| def-g-C <sub>3</sub> N <sub>4</sub> -5 | 72.0%                    | 16.5%                                 | 11.5%             | 2.6                                                             |

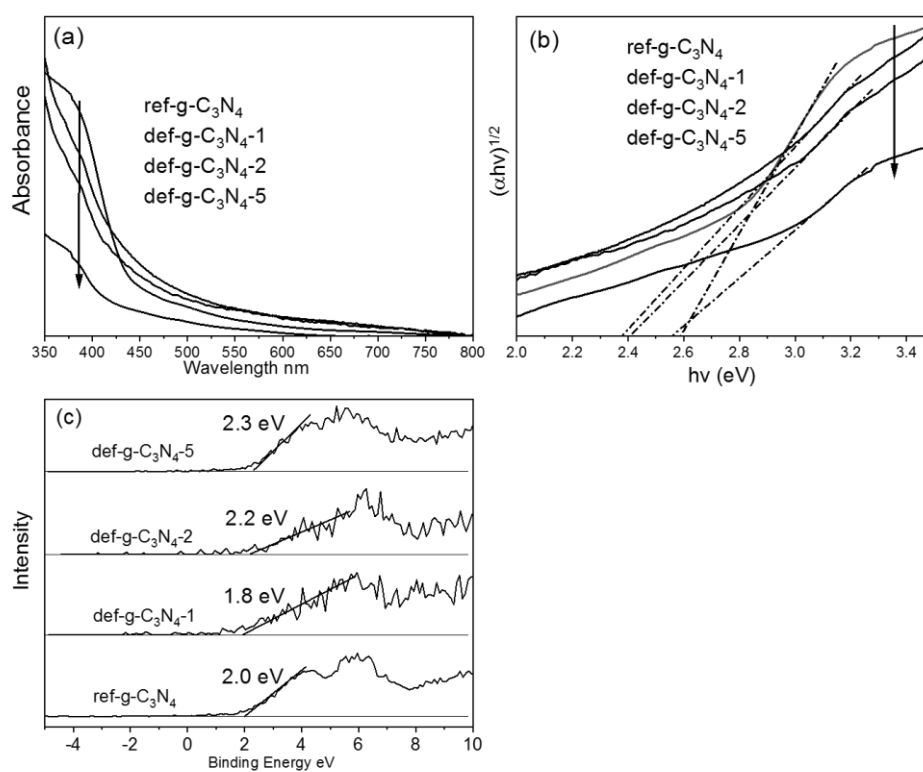

Figure S5. (a) UV-vis spectra, (b) Tauc plots and (c) XPS valence band spectra of ref-g-C<sub>3</sub>N<sub>4</sub>, def-g-C<sub>3</sub>N<sub>4</sub>-1, def-g-C<sub>3</sub>N<sub>4</sub>-2 and def-g-C<sub>3</sub>N<sub>4</sub>-5 films

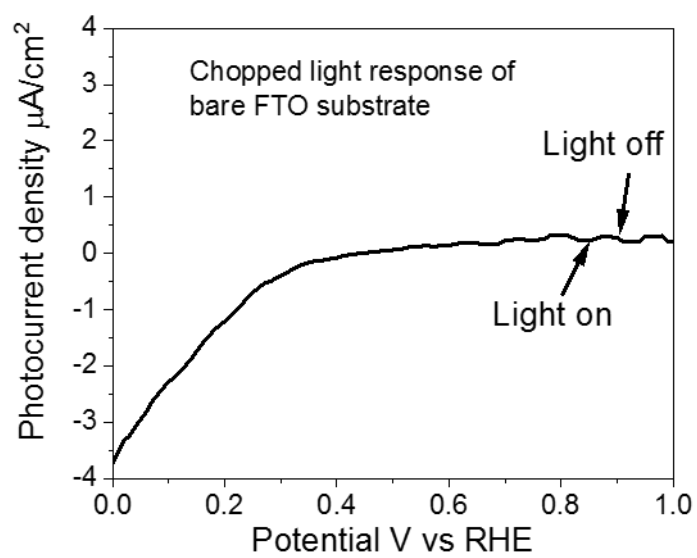

Figure S6 Chopped light-response of bare FTO substrate.

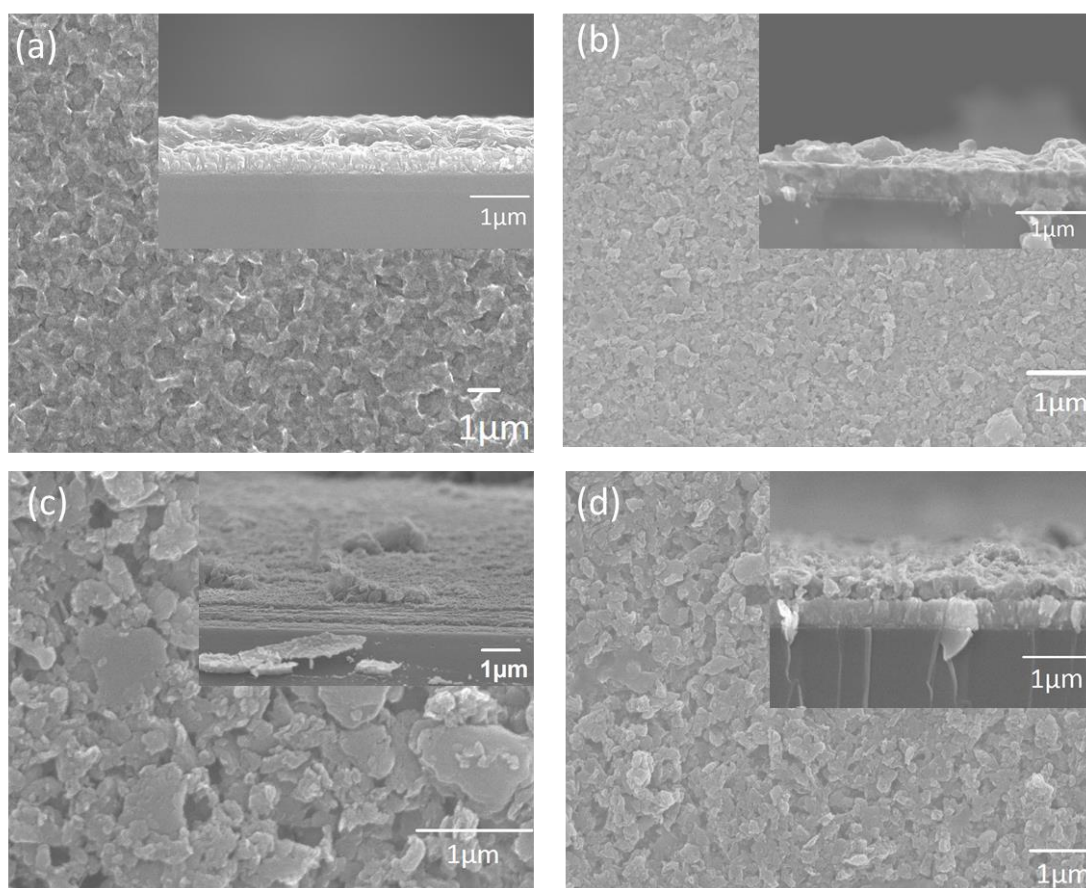

Figure S7. SEM images of (a) ref-g-C<sub>3</sub>N<sub>4</sub>, (b) def-g-C<sub>3</sub>N<sub>4</sub>-1, (c) def-g-C<sub>3</sub>N<sub>4</sub>-2 and (d) def-g-C<sub>3</sub>N<sub>4</sub>-5 films

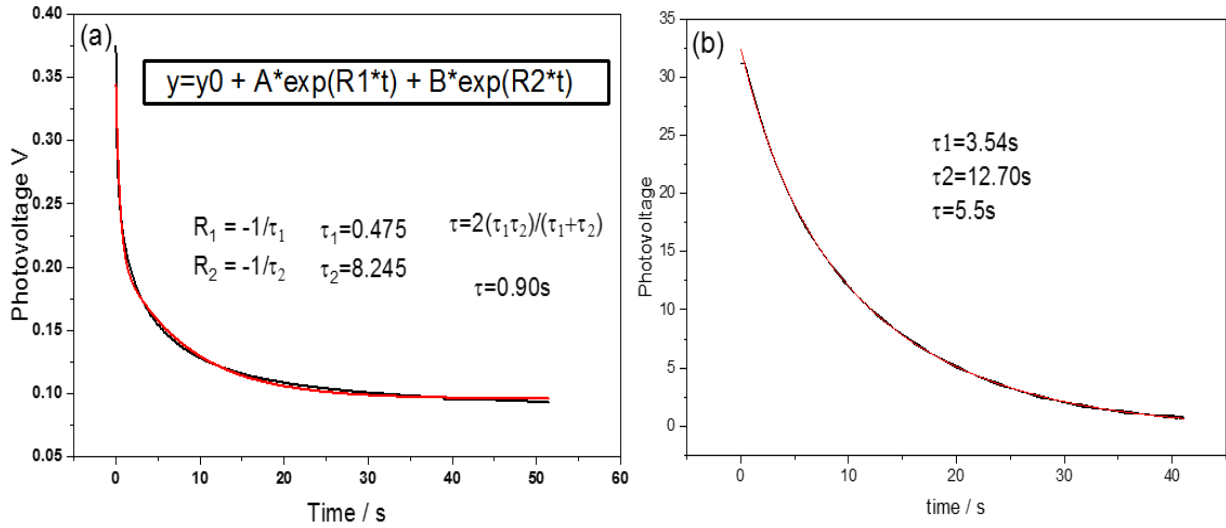

Figure S8. determination of average electron lifetime of (a) ref-g-C<sub>3</sub>N<sub>4</sub> and (b) def-g-C<sub>3</sub>N<sub>4</sub>-5 films

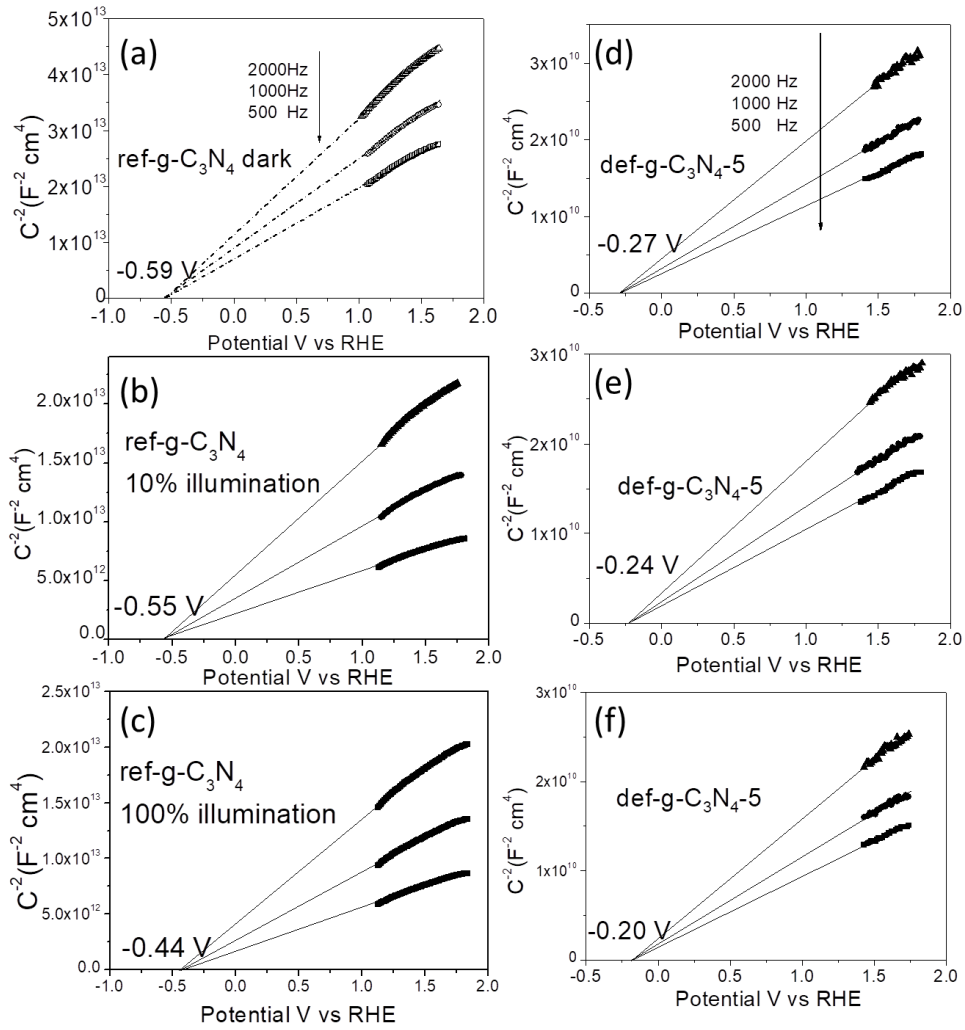

Figure S9 (a-c) Mott-schottky plots of ref-g-C<sub>3</sub>N<sub>4</sub> electrode at 500 Hz, 1000 Hz and 2000 Hz with 0% - 100% illumination; (d-f) Mott-schottky plots of def-g-C<sub>3</sub>N<sub>4</sub>-5 electrode at 1 KHz with 0% - 100% illumination;

Table S4 Carrier density N<sub>D</sub> and depletion layer width of ref-g-C<sub>3</sub>N<sub>4</sub> and def-g-C<sub>3</sub>N<sub>4</sub>-5 samples

|                                          | Measured slope (1000 Hz) | N <sub>D</sub> (ε <sub>r</sub> =7.7)     | W <sub>sc</sub> (ε <sub>r</sub> =7.7; 0V vs RHE) |
|------------------------------------------|--------------------------|------------------------------------------|--------------------------------------------------|
| ref-g-C <sub>3</sub> N <sub>4</sub> dark | 1.57*10 <sup>13</sup>    | 1.2*10 <sup>18</sup> (cm <sup>-3</sup> ) | 22 nm                                            |
| 10% illumination                         | 6.18*10 <sup>12</sup>    | 3.1*10 <sup>18</sup> (cm <sup>-3</sup> ) | /                                                |
| 100% illumination                        | 6.13*10 <sup>12</sup>    | 3.1*10 <sup>18</sup> (cm <sup>-3</sup> ) | /                                                |
| def-g-C <sub>3</sub> N <sub>4</sub> -5   | 1.10*10 <sup>10</sup>    | 1.7*10 <sup>21</sup> (cm <sup>-3</sup> ) | 0.4 nm                                           |
| 10% illumination                         | 1.03*10 <sup>10</sup>    | 1.8*10 <sup>21</sup> (cm <sup>-3</sup> ) | /                                                |
| 100% illumination                        | 0.98*10 <sup>10</sup>    | 1.9*10 <sup>21</sup> (cm <sup>-3</sup> ) | /                                                |

$$\frac{1}{C^2} = \frac{2}{\varepsilon\varepsilon_0 A^2 e N_D} \left( V - V_{fb} - \frac{k_B T}{e} \right)$$

$$slope = \frac{2}{\varepsilon\varepsilon_0 A^2 e N_D}$$

$$W_{sc} = \sqrt{\frac{2\varepsilon_0\varepsilon_r}{e N_D} \left( V - V_{fb} - \frac{k_B T}{e} \right)}$$

ε<sub>0</sub> is the vacuum permittivity: 8.854187817×10<sup>-14</sup> F/cm, ε<sub>r</sub> is the static dielectric constant: it is 7.7 for c-C<sub>3</sub>N<sub>4</sub><sup>3</sup> and current not available for g-C<sub>3</sub>N<sub>4</sub>; A is the area: 1 cm<sup>2</sup>; e is the electron charge: 1.6×10<sup>-19</sup>C.

Table S5. Analysis of impedance plots of ref-g-C<sub>3</sub>N<sub>4</sub> and def-g-C<sub>3</sub>N<sub>4</sub>-5; R<sub>s</sub> is the system resistance, R<sub>ct</sub> is the charge transfer resistance, CPE is the constant phase element representing the double layer capacitor.

|                                        | R <sub>s</sub> (Ω cm <sup>2</sup> ) | R <sub>ct</sub> / (Ω cm <sup>2</sup> ) | CPE (S <sup>n</sup> Ω <sup>-1</sup> cm <sup>-2</sup> ) | N             |
|----------------------------------------|-------------------------------------|----------------------------------------|--------------------------------------------------------|---------------|
| ref-g-C <sub>3</sub> N <sub>4</sub>    | 218 (±116.93%)                      | 1.3 * 10 <sup>5</sup> (±0.46%)         | 8.1 * 10 <sup>-7</sup> (±1.26%)                        | 0.94 (±0.49%) |
| def-g-C <sub>3</sub> N <sub>4</sub> -5 | 49 (±27.35%)                        | 5.6 * 10 <sup>3</sup> (±0.86%)         | 4.5 * 10 <sup>-5</sup> (±1.71%)                        | 0.85 (±0.90%) |

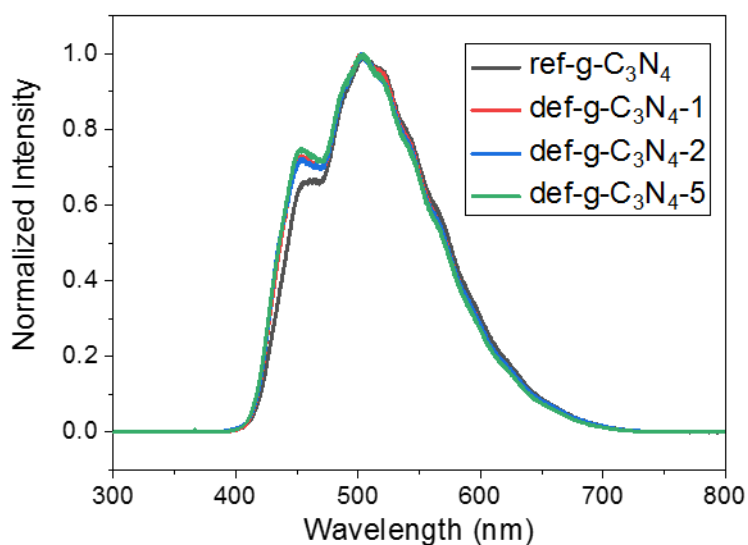

Figure S10. Normalised photoluminescence spectra of ref-g-C<sub>3</sub>N<sub>4</sub>, def-g-C<sub>3</sub>N<sub>4</sub>-1, def-g-C<sub>3</sub>N<sub>4</sub>-2 and def-g-C<sub>3</sub>N<sub>4</sub>-5 samples after 325 nm excitation, recorded using a Renishaw InVia Raman Microscope (325nm)

Photoluminescence (PL) spectroscopy was undertaken using a 325 nm laser probe. The PL signal peaks around 450 and 500 nm are assigned to the  $\pi$ - $\pi^*$  transitions and  $n$ - $\pi^*$  emission, respectively.<sup>4</sup>

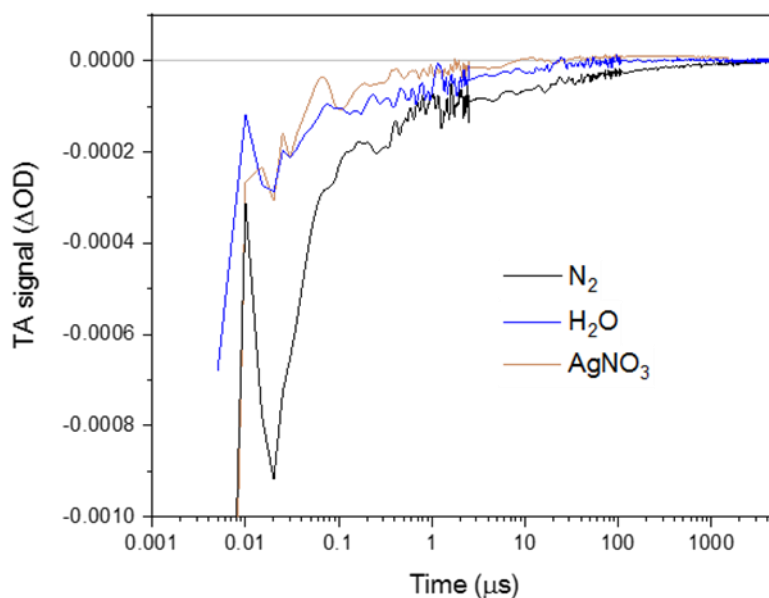

Figure S11 TAS spectra of def-g-C<sub>3</sub>N<sub>4</sub>-1 sample in N<sub>2</sub>, (N<sub>2</sub>-flushed) water and (N<sub>2</sub>-flushed) 2mM AgNO<sub>3</sub> solution.



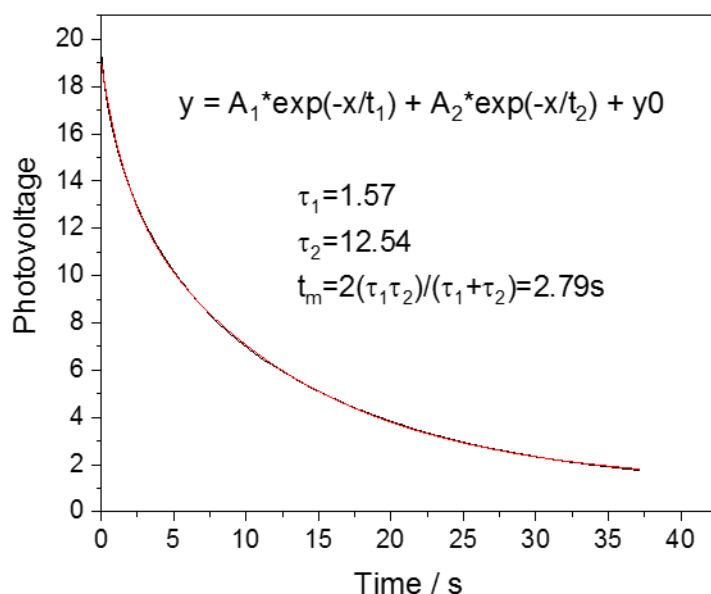

Figure S12. OCVD curve (black) and fitted analysis (red) of H<sub>2</sub>O<sub>2</sub> treated ref-g-C<sub>3</sub>N<sub>4</sub> sample

## Reference

1. Zhang, Q.; Chen, P.; Tan, C.; Chen, T.; Zhuo, M.; Xie, Z.; Wang, F.; Liu, H.; Cai, Z.; Liu, G., A photocatalytic degradation strategy of PPCPs by a heptazine-based CN organic polymer (OCN) under visible light. *Environmental Science: Nano* **2018**, *5* (10), 2325-2336.
2. Wang, Y.; Bayazit, M. K.; Moniz, S. J.; Ruan, Q.; Lau, C. C.; Martsinovich, N.; Tang, J., Linker-controlled polymeric photocatalyst for highly efficient hydrogen evolution from water. *Energy & Environmental Science* **2017**, *10* (7), 1643-1651.
3. Mo, S.-D.; Ouyang, L.; Ching, W.; Tanaka, I.; Koyama, Y.; Riedel, R., Interesting physical properties of the new spinel phase of Si<sub>3</sub>N<sub>4</sub> and C<sub>3</sub>N<sub>4</sub>. *Physical Review Letters* **1999**, *83* (24), 5046.
4. Jorge, A. B.; Martin, D. J.; Dhanoa, M. T.; Rahman, A. S.; Makwana, N.; Tang, J.; Sella, A.; Corà, F.; Firth, S.; Darr, J. A., H<sub>2</sub> and O<sub>2</sub> evolution from water half-splitting reactions by graphitic carbon nitride materials. *The Journal of Physical Chemistry C* **2013**, *117* (14), 7178-7185.
